# Supplementary material
Source: Springer Nature journal article supplement (https://www.springermedizin.de/resource/supplementary/12885_2012_4027_MOESM20_ESM.pdf/9465002)

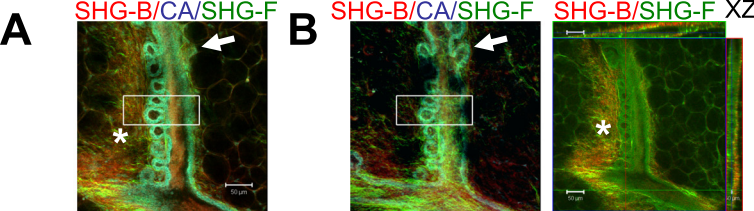

**C**

XY ↓  
XY

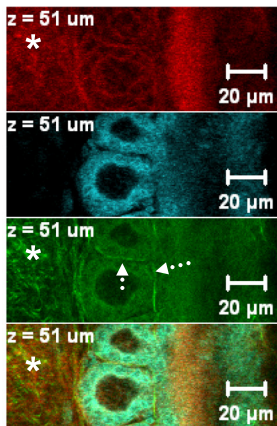

**D**

↓ 3D  
3D

XY YZ

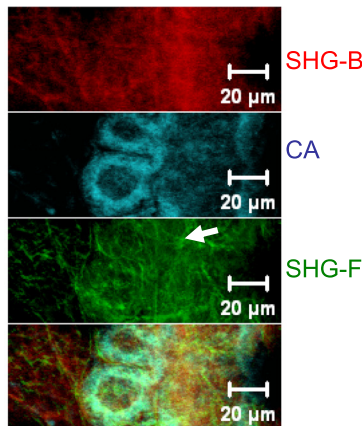

**E**

SHG-B/SHG-F

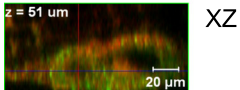

XZ

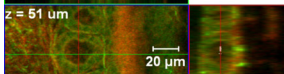

XY

YZ

**F**

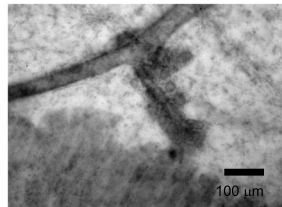

Supplement: MOESM20 [file 9465002]
